# Supplementary material for: Association of human papillomavirus vaccination with cervical cancer screening: A systematic review and meta-analysis
Source: PubMed Central journal article supplement (PMC11132352; doi:10.1097/md.0000000000029329), 2022-07-15
Supplement: medi-101-e29329-s001.pdf [file medi-101-e29329-s001.pdf]

**Supplement to**

**Association of Human Papillomavirus Vaccination with Cervical Cancer Screening: A**

**Systematic Review and Meta-Analysis of Observational Studies**

Paddy Ssentongo, MD, PhD, MPH<sup>1,2</sup>, Jennifer S. McCall-Hosenfeld, MD, MSc<sup>3,1</sup>, Vernon M. Chinchilli, PhD<sup>1</sup>, Eugene J. Lengerich, V.M.D., M.S.<sup>1</sup>, William Calo, PhD, JD, MPH<sup>1</sup>, Djibril M. Ba, PhD, MPH<sup>1</sup>

<sup>1</sup>Department of Public Health Sciences, Penn State College of Medicine, Hershey, PA, USA

<sup>2</sup>College of Engineering Science and Mechanics, The Pennsylvania State University, State College, PA, USA

<sup>3</sup>Department of Medicine, Penn State College of Medicine, Hershey, PA, USA

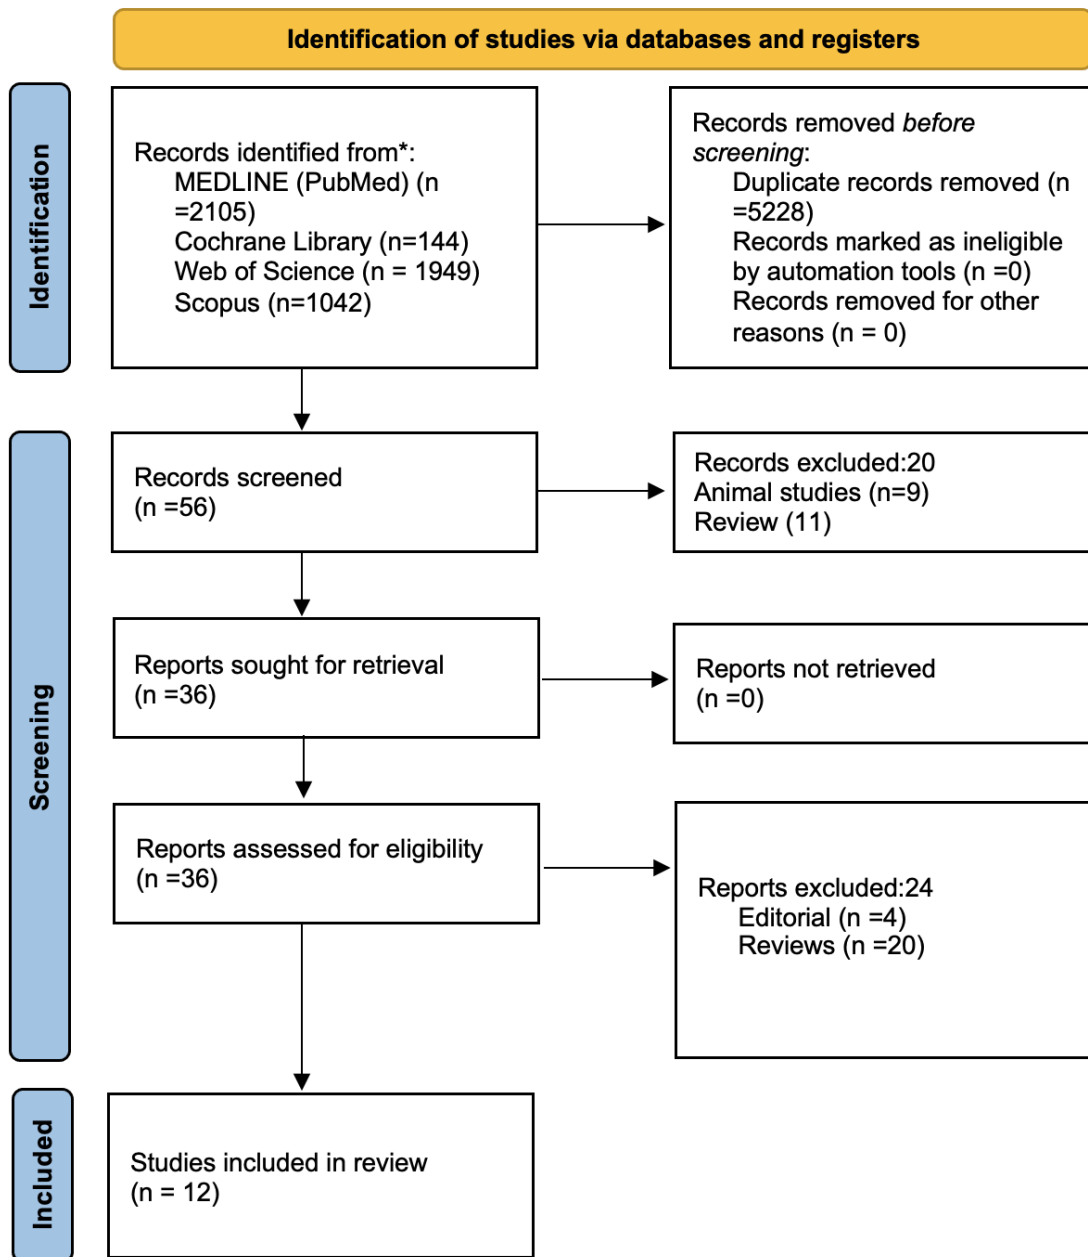

**Supplemental Figure 1:** PRISMA flow diagram showing study selection process.

**Supplement to**

**Association of Human Papillomavirus Vaccination with Cervical Cancer Screening: A**

**Systematic Review and Meta-Analysis of Observational Studies**

Paddy Ssentongo, MD, PhD, MPH<sup>1,2</sup>, Jennifer S. McCall-Hosenfeld, MD, MSc<sup>3,1</sup>, Vernon M. Chinchilli, PhD<sup>1</sup>, Eugene J. Lengerich, V.M.D., M.S.<sup>1</sup>, William Calo, PhD, JD, MPH<sup>1</sup>, Djibril M. Ba, PhD, MPH<sup>1</sup>

<sup>1</sup>Department of Public Health Sciences, Penn State College of Medicine, Hershey, PA, USA

<sup>2</sup>College of Engineering Science and Mechanics, The Pennsylvania State University, State College, PA, USA

<sup>3</sup>Department of Medicine, Penn State College of Medicine, Hershey, PA, USA

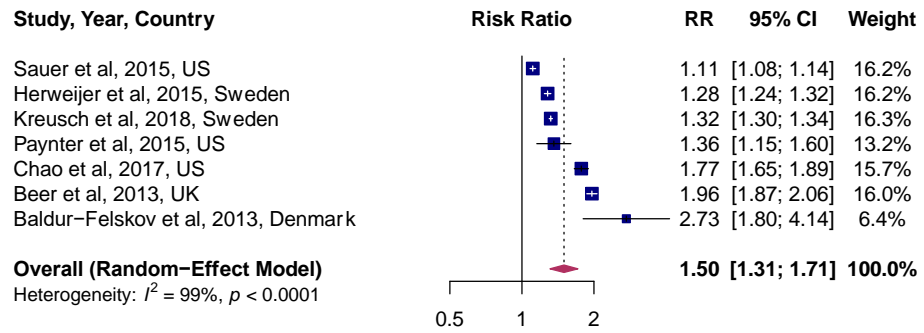

**Supplemental Figure 2:** Forest plot of the overall pooled crude effect estimate.

**Supplement to**

**Association of Human Papillomavirus Vaccination with Cervical Cancer Screening: A**

**Systematic Review and Meta-Analysis of Observational Studies**

Paddy Ssentongo, MD, PhD, MPH<sup>1,2</sup>, Jennifer S. McCall-Hosenfeld, MD, MSc<sup>3,1</sup>, Vernon M. Chinchilli, PhD<sup>1</sup>, Eugene J. Lengerich, V.M.D., M.S.<sup>1</sup>, William Calo, PhD, JD, MPH<sup>1</sup>, Djibril M. Ba, PhD, MPH<sup>1</sup>

<sup>1</sup>Department of Public Health Sciences, Penn State College of Medicine, Hershey, PA, USA

<sup>2</sup>College of Engineering Science and Mechanics, The Pennsylvania State University, State College, PA, USA

<sup>3</sup>Department of Medicine, Penn State College of Medicine, Hershey, PA, USA

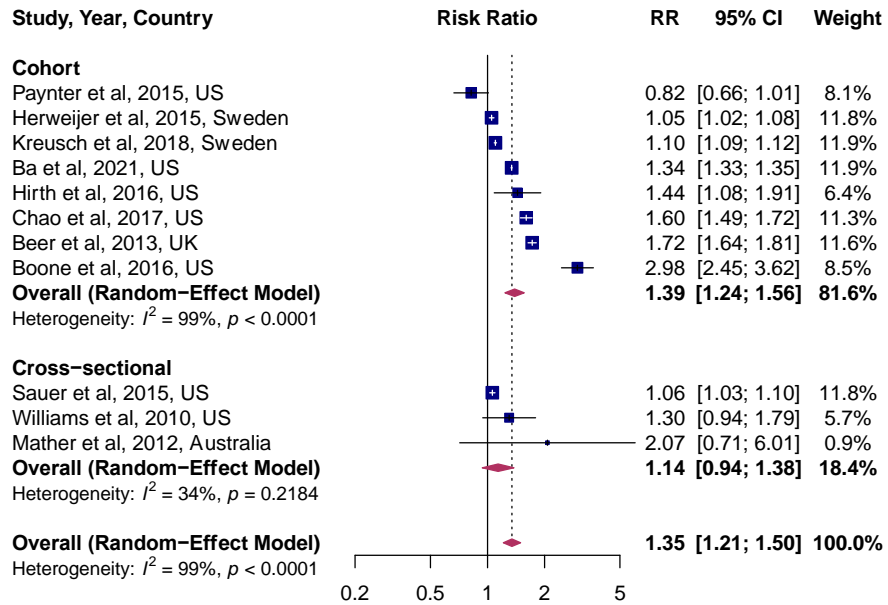

**Supplemental Figure 3:** Forest plot of studies stratified by study design.

**Supplement to**

**Association of Human Papillomavirus Vaccination with Cervical Cancer Screening: A**

**Systematic Review and Meta-Analysis of Observational Studies**

Paddy Ssentongo, MD, PhD, MPH<sup>1,2</sup>, Jennifer S. McCall-Hosenfeld, MD, MSc<sup>3,1</sup>, Vernon M. Chinchilli, PhD<sup>1</sup>, Eugene J. Lengerich, V.M.D., M.S.<sup>1</sup>, William Calo, PhD, JD, MPH<sup>1</sup>, Djibril M. Ba, PhD, MPH<sup>1</sup>

<sup>1</sup>Department of Public Health Sciences, Penn State College of Medicine, Hershey, PA, USA

<sup>2</sup>College of Engineering Science and Mechanics, The Pennsylvania State University, State College, PA, USA

<sup>3</sup>Department of Medicine, Penn State College of Medicine, Hershey, PA, USA

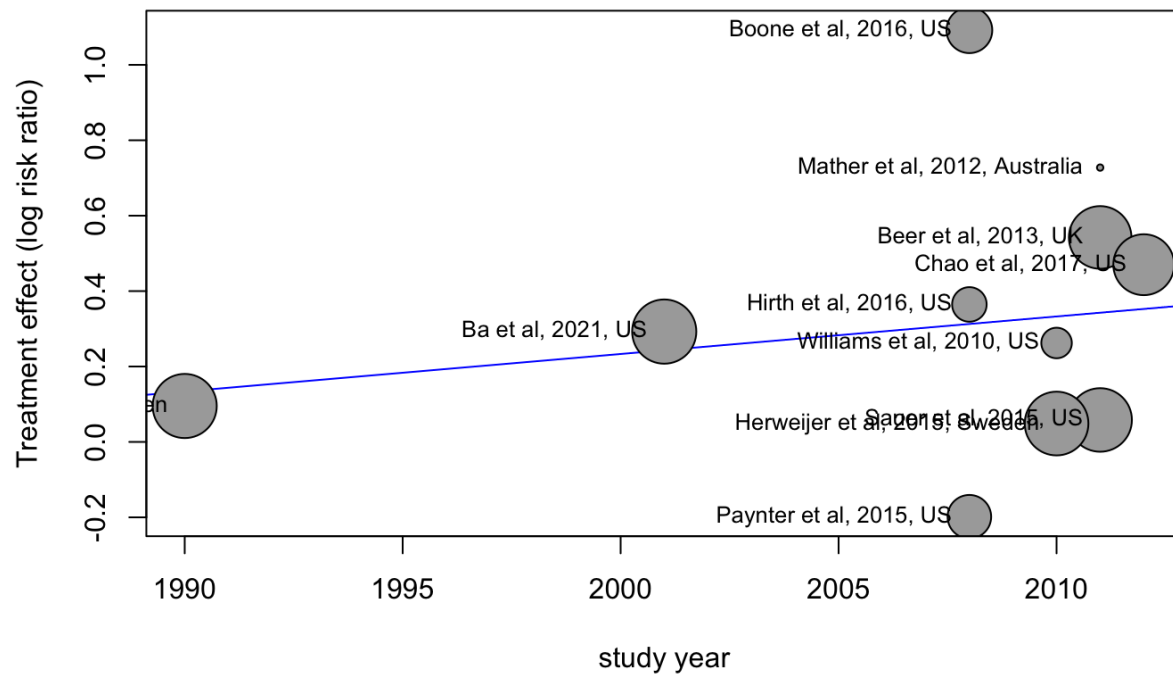

**Supplemental Figure 4:** Meta-regression.



**Supplement to**

**Association of Human Papillomavirus Vaccination with Cervical Cancer Screening: A**

**Systematic Review and Meta-Analysis of Observational Studies**

Paddy Ssentongo, MD, PhD, MPH<sup>1,2</sup>, Jennifer S. McCall-Hosenfeld, MD, MSc<sup>3,1</sup>, Vernon M. Chinchilli, PhD<sup>1</sup>, Eugene J. Lengerich, V.M.D., M.S.<sup>1</sup>, William Calo, PhD, JD, MPH<sup>1</sup>, Djibril M. Ba, PhD, MPH<sup>1</sup>

<sup>1</sup>Department of Public Health Sciences, Penn State College of Medicine, Hershey, PA, USA

<sup>2</sup>College of Engineering Science and Mechanics, The Pennsylvania State University, State College, PA, USA

<sup>3</sup>Department of Medicine, Penn State College of Medicine, Hershey, PA, USA

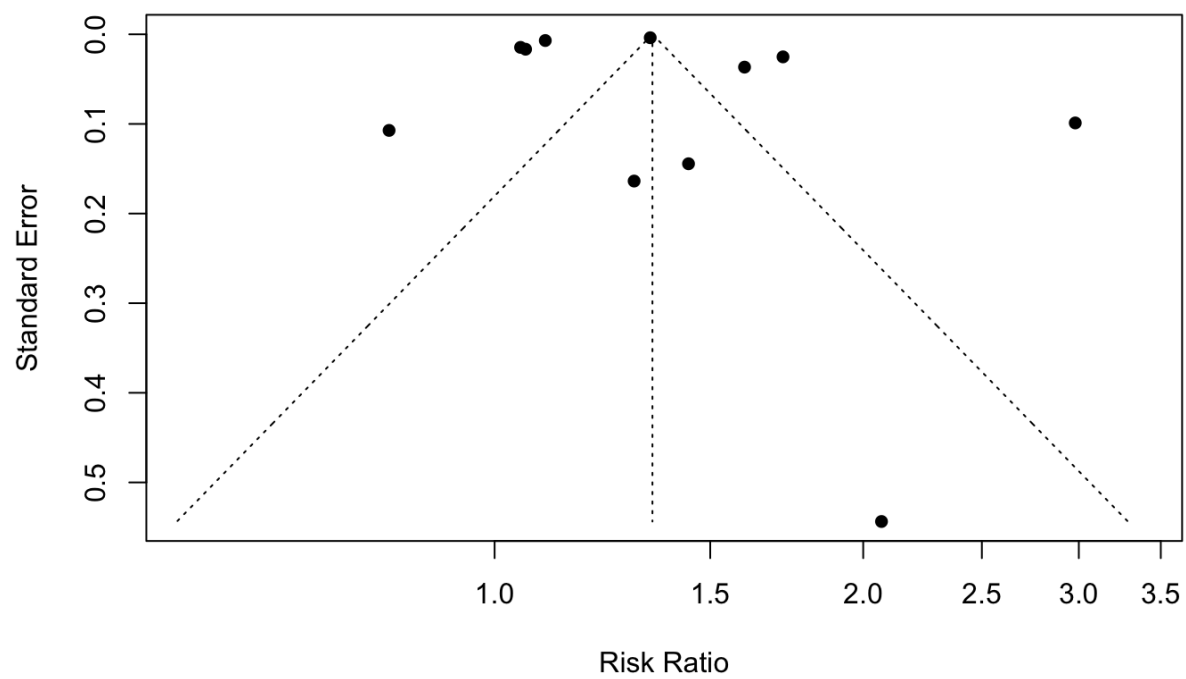

**Supplemental Figure 5:** Funnel plot

**Supplement to**

**Association of Human Papillomavirus Vaccination with Cervical Cancer Screening: A**

**Systematic Review and Meta-Analysis of Observational Studies**

Paddy Ssentongo, MD, PhD, MPH<sup>1,2</sup>, Jennifer S. McCall-Hosenfeld, MD, MSc<sup>3,1</sup>, Vernon M. Chinchilli, PhD<sup>1</sup>, Eugene J. Lengerich, V.M.D., M.S.<sup>1</sup>, William Calo, PhD, JD, MPH<sup>1</sup>, Djibril M. Ba, PhD, MPH<sup>1</sup>

<sup>1</sup>Department of Public Health Sciences, Penn State College of Medicine, Hershey, PA, USA

<sup>2</sup>College of Engineering Science and Mechanics, The Pennsylvania State University, State College, PA, USA

<sup>3</sup>Department of Medicine, Penn State College of Medicine, Hershey, PA, USA

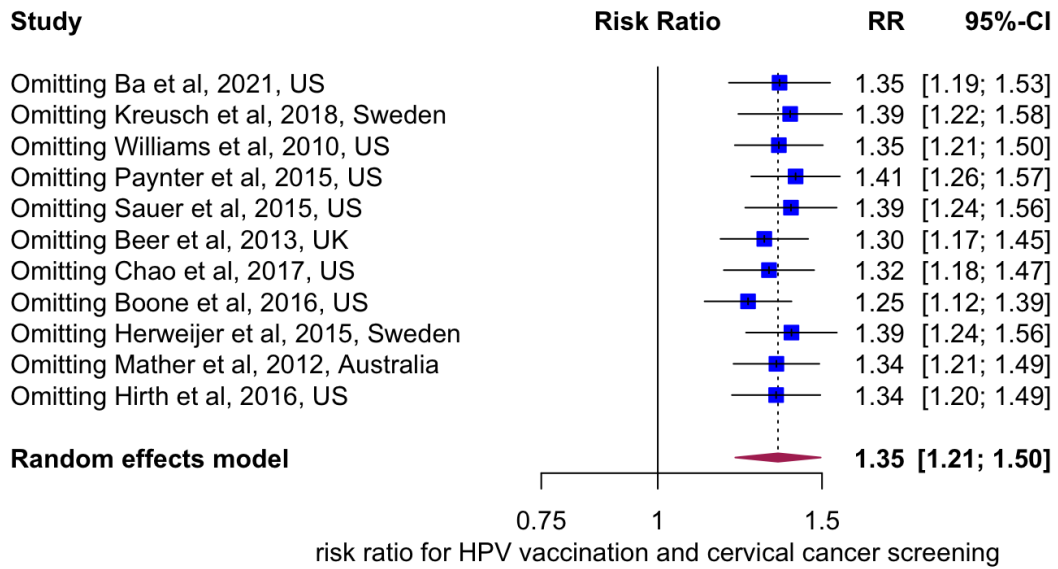

**Supplemental Figure 6:** Influential and outlier analysis.
